# Supplementary material
Source: HighWire-hosted journal article supplement (https://jnm.snmjournals.org/highwire/filestream/94466/field_highwire_adjunct_files/0/111997_Supplemental_Data.pdf)

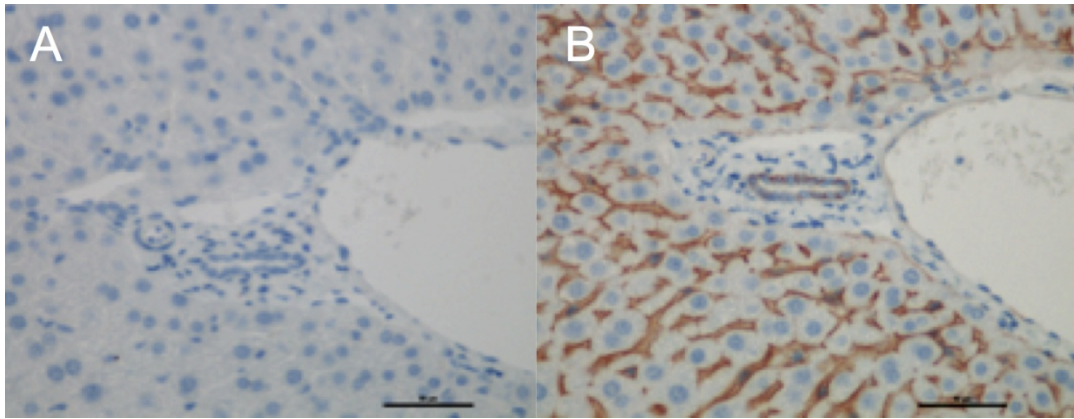

Supplemental Figure 1.

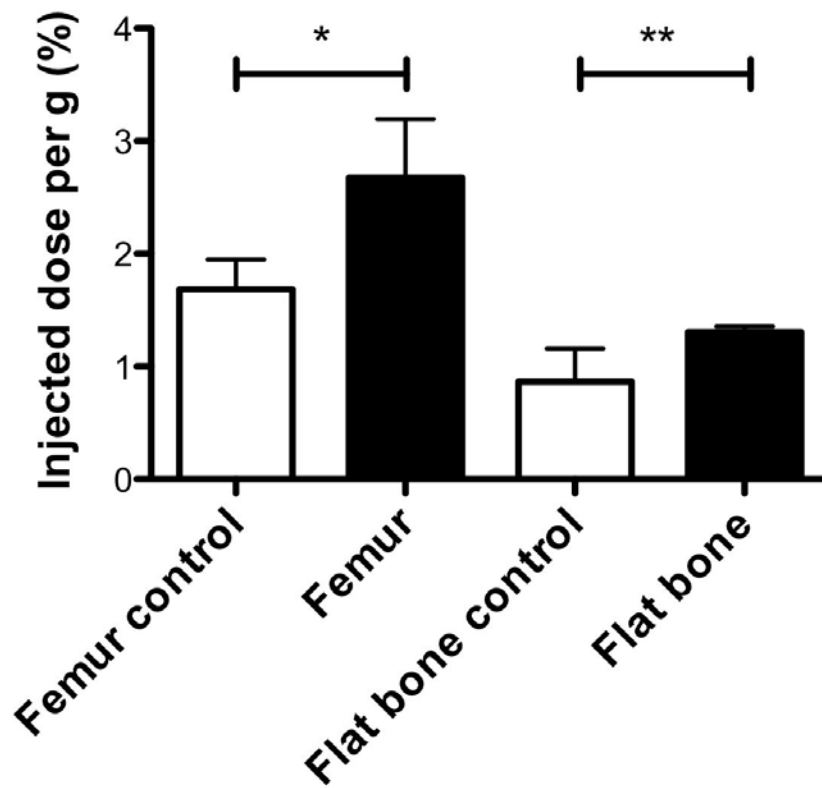

Supplemental Figure 2.

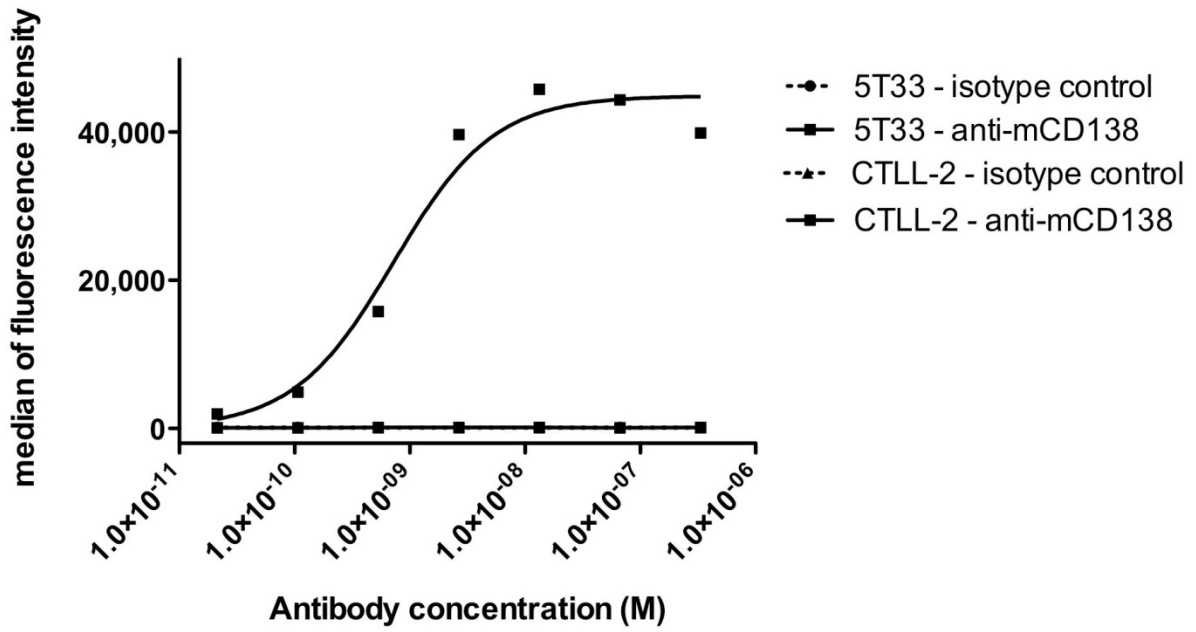

Supplemental Figure 3.

Supplement: 111997_Supplemental_Data.pdf [file 111997_Supplemental_Data.pdf]
